# Supplementary figures and images for: Identification of Nontuberculous Mycobacteria Isolated From Household Showerheads of Patients With Nontuberculous Mycobacteria
Source: Research Square preprint supplement (doi:10.21203/rs.3.rs-1248306/v1), 2022-02-08

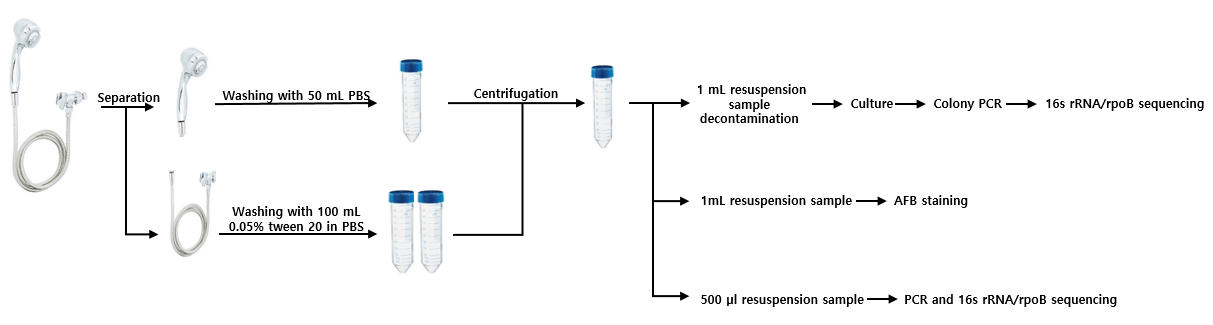


**Supplemental Figure 1. Sample collection and processing**

Supplement: Supplementary file 1 [file c1ac8d56975833e73efc551f.docx]
